# Supplementary material
Source: publisher figshare collection journal article supplement (https://gsapubs.figshare.com/articles/dataset/_/12541880)
Supplement: Supplementary file 1 [file 1]

## Sheet: Table DR1  Priekule-20, Latvia
Depth in Core (m)	Formation	d13Ccarb	d18Ocarb	d13Corg	TOC (wt%)	TIC (wt%)	d34Spyr	Pyr (wt%)	[Mn] (ppm)	Carb corr. [Mn] (ppm)	e205T1	n	* e205T1 2s
975.1	Mituva	-0.0808	-3.92994	-26.6336	0.241311	14.818	-25.6294	0.076254	509.97	585.538	-3.22656	2	0.108753
978.7	Mituva	-0.405564	-3.28188	-26.5345	0.150991	18.3873	-23.4293	0.110482	478.71	566.732	-3.46839	3	0.335633
983.5	Engure	-0.547141	-4.02771	-27.1838	0.128189	27.5283		0.145838			-3.30039	9	0.656382
987.2	Engure	0.0343667	-3.8286	-27.0999	0.279476	17.8013	-28.6636	0.0704675	523.56	616.761		0
989	Engure	-0.459402	-4.67691	-27.1068	0.11034	37.4931	-25.9886	0.101437			-3.59489	2	0.37472
992	Engure	-0.0666302	-3.87186	-27.2744	0.151191	21.1615	-29.2287	0.150791			-4.07352	2	0.453464
996.4	Engure	0.458843	-4.69805	-26.1662	0.238869	9.86071	-30.8085	0.105189	475.73	522.64	-2.84915	3	0.0620807
999.7	Engure	0.434129	-4.09181	-26.2678	0.0927634	25.8052		0.0176709	588.05	739.797	-2.87187	1	x
1003.8	Engure	0.929735	-3.31833	-26.6843	0.102494	39.0677	-28.3434	0.0608048			-3.10321	4	0.35518
1006.7	Engure	1.4272	-3.26317	-25.7169	0.238041	29.9879		0.0152434	582.92	757.725	-2.57361	3	0.325066
1009	Engure	0.623007	-4.16694	-26.7811	0.124017	52.0419	-30.7375	0.0724139			-3.9789	4	0.435848
1013.3	Engure	0.793732	-2.90233	-26.3702	0.0804704	30.583		0.0799896	577.54	754.169	-3.33039	4	0.919017
1016.1	Engure	1.4004	-3.49421	-26.1462	0.206122	37.5388	-30.4197	0.0724168	596.02	819.758	-3.12543	2	0.312777
1019.2	Engure	1.72659	-3.76002	-26.1281	0.0990292	41.0199	-21.6598	0.0987134	584.18	823.81	-3.2468	4	0.248781
1022.3	Engure	1.45632	-3.23077	-24.9793	0.142386	37.2087	14.8179	0.308086	607.44	833.461	-3.48558	2	0.341202
1025	Dubysa (Nova Mbr.)	3.7462	-3.47085	-23.9368	0.162337	42.0225	2.08194	0.191247	529.35	751.796	-3.2329	3	0.387744
1028.25	Dubysa (Nova Mbr.)	5.73077	-4.75386	-23.5157	0.274269	51.9648		0.387595	430.89	654.801	-3.21615	2	0.11246
1030.2	Dubysa (Nova Mbr.)	2.6397	-3.62899	-24.505	0.304455	32.3432	7.45805	0.3806	417.66	552.745	-3.61144	3	0.263049
1032.7	Dubysa (Nova Mbr.)	4.43067	-4.94321	-23.7587	0.419351	69.7742	-7.46839	0.191943	579.09	983.145	-3.58267	3	0.0961257
1035.3	Dubysa (Nova Mbr.)	4.0707	-4.75235	-24.5312	0.57121	62.666	-4.77507	0.220608	505.24	821.854	-3.36067	3	0.229306
1037.6	Dubysa (Nova Mbr.)	1.56665	-4.01477	-26.9139	0.75684	42.0727	-15.4456	0.390032	458.03	650.735	-3.85339	3	0.16121
1040.5	Dubysa (Sheshpe Mbr.)	2.2302	-5.11162	-28.6773	0.658499	31.4064	-22.3332	0.415549	441.81	580.567	-3.21444	2	0.230204
1042.6	Dubysa (Sheshpe Mbr.)	1.05106	-4.88571	-28.2223	0.746302	28.6235	-25.0959	0.524598	429.32	552.206	-3.02491	4	0.278617
1045.4	Dubysa (Sheshpe Mbr.)	1.3454	-5.39856	-28.1367	1.19185	27.3265	-23.7571	0.754342			-2.62487	4	0.0615025
1047.6	Dubysa (Sheshpe Mbr.)	0.774483	-5.34977	-28.4023	0.9964	18.1201	-23.8981	0.656297	348.32	411.436	-3.19677	4	0.0626782
1052.6	Dubysa (Sheshpe Mbr.)	0.322906	-5.85592	-28.4778	0.614967	19.3266	-24.9506	0.571486	308.12	367.669	-4.01421	3	0.175261
1055.9	Dubysa (Sheshpe Mbr.)	0.3214	-6.04091	-29.1399	1.124	13.5382	-20.5791	0.790947	368.22	418.07	-3.83908	3	0.124441
1057.8	Dubysa (Sheshpe Mbr.)	0.0597856	-4.30811	-28.6923	0.371145	64.7118	-22.8701	0.287365	329.69	543.038	-4.37766	3	0.38466
1062.2	Dubysa (Sheshpe Mbr.)	0.0922479	-5.22906	-28.7296	0.510169	26.9353	-17.7279	0.425487			-3.5434	4	0.245333
1064.8	Dubysa (Sheshpe Mbr.)	-0.330856	-5.97179	-29.5909	1.07824	17.6915	-23.0041	0.0723773	402.3	473.473	-4.23274	3	0.36324
1067.8	Dubysa (Sheshpe Mbr.)	-0.188691	-4.8699	-29.3945	0.736157	20.8588	-22.7987	0.143165	352.47	425.991	-4.07772	5	0.668699
1072.2	Dubysa (Sheshpe Mbr.)	-0.197624	-4.75204	-28.8304	0.563773	21.5371	-18.8066	0.45597	376.12	457.125	-4.12092	4	0.376712
1076	Dubysa (Sheshpe Mbr.)	-0.174425	-5.34701	-28.9781	0.894074	17.9749	-20.8614	0.400164	396.41	467.664	-4.59725	3	0.35932
1078.8	Dubysa (Sheshpe Mbr.)	-1.83526	-4.76395	-28.5592	0.301719	50.165	-21.0751	0.317522			-3.77657	3	0.4216
1082.8	Dubysa (Sheshpe Mbr.)	-0.371086	-5.53963	-29.4998	1.17336	17.8299	-22.156	0.460939	348.15	410.225	-3.67451	2	0.440788
1085.2	Dubysa (Sheshpe Mbr.)	-0.5618	-5.753	-29.6067	1.20366	16.9892	-18.1584	0.632618	398.76	466.506	-3.81663	3	0.0640179

## Sheet: Table DR2 Uddvide-1, Sweden
Composite Section Meterage (m)	Formation	d13Ccarb	d18Ocarb	d13Corg	TOC (wt%)	TIC (wt%)	d34SCAS	[CAS] (ppm)
0	Sundre (lower)	2.87139	-7.98594	-26.7932	0.0248497		40.6488	21.5477
3	Sundre (lower)	3.60482	-7.86466	-26.9766	0.0219722
6	upper Hamra/lower Sundre	5.85701	-7.80452	-27.1269	0.101499
9	Hamra (b)	5.91661	-6.96774	-26.4041	0.110047		38.9496	5.64979
12	Hamra (upper)	6.48278	-7.78168	-25.7069	0.0581771		40.0824	96.2634
15	Hamra (b)	7.03453	-7.60106	-27.3785	0.258306		35.1224	265.108
18	Burgsvik Oolite Mem.	7.46106	-7.00596	-27.526	0.0109491	95.6343	30.7016	42.7814
18.5	Burgsvik Oolite Mem.	7.25793	-7.35764		0	88.0944
18.77	Burgsvik Oolite Mem.	6.97592	-7.28822				22.9773	164.16
19.18	Burgsvik Oolite Mem.	3.01546	-7.01789
19.82	Burgsvik Oolite Mem.	4.68815	-7.55776	-24.428	0.240633	10.8436	25.8369	28.1548
20.71	Burgsvik Ss Mem.	3.83119	-8.68251
21.58	Burgsvik Ss Mem.	3.77832	-10.6908	-24.4334	0.17643	10.1225		3.11081
22.67	Burgsvik Ss Mem.	3.63151	-9.55352
23.73	Burgsvik Ss Mem.	3.86197	-8.96583	-24.4589	0.074726	6.12308		1.14702
24.74	Burgsvik Ss Mem.	3.34693	-8.78328
25.74	Burgsvik Ss Mem.	3.68985	-9.52127	-26.3761	0.0802042	5.75303
26.74	Burgsvik Ss Mem.	3.87001	-9.29211
27.75	Burgsvik Ss Mem.	3.46015	-8.93315	-25.3324	0.0332897	8.03944	24.8582	8.85635
28.75	Burgsvik Ss Mem.	3.68387	-9.53804
29.7	Burgsvik Ss Mem.	3.78526	-9.81927	-24.2394	0.0684954	9.87442
30.63	Burgsvik Ss Mem.	3.54866	-6.29611
31.64	Burgsvik Ss Mem.	3.77641	-10.4667	-23.4243	0.0140689	22.6986	20.3413	13.8794
32.33	Burgsvik Ss Mem.	3.11566	-8.64373
33.74	Burgsvik Ss Mem.	2.22051	-8.27972	-23.5652	0.0412413	8.55581	19.0867	19.0711
34.63	Burgsvik Ss Mem.	3.22947	-7.45333
35.72	Burgsvik Ss Mem.	3.16195	-8.72964	-26.8668	0.0287155	9.41474	17.6999	20.0838
36.57	Burgsvik Ss Mem.	3.05843	-6.33878
37.74	Burgsvik Ss Mem.	3.43906	-7.5023	-24.6071	0.0651181	8.9257	20.5579	42.9298
38.7	Burgsvik Ss Mem.	4.10625	-9.38821
39.81	Burgsvik Ss Mem.	3.6687	-9.02537	-24.1513	0.0843753	16.7897	20.4841	86.7016
40.73	Burgsvik Ss Mem.	4.48815	-6.43083
41.79	Burgsvik Ss Mem.	4.2216	-7.21473	-23.3598	0.189407	14.0623	21.9578	126.059
42.96	Burgsvik Ss Mem.	4.26502	-6.60185
43.7	Burgsvik Ss Mem.	3.8812	-7.6193	-23.1291	0.127355	13.716	20.0808	151.271
44.71	Burgsvik Ss Mem.	4.01816	-7.37032
45.78	Burgsvik Ss Mem.	3.93194	-7.19417	-22.9179	0.204512	15.4559	21.8515	180.322
46.77	Burgsvik Ss Mem.	4.14806	-6.93967
47.67	Burgsvik Ss Mem.	3.83505	-7.17179	-23.7359	0.249768	12.6991	19.4567	163.458
48.67	Burgsvik Ss Mem.	4.25689	-6.15562
49.73	Burgsvik Ss Mem.	4.59598	-6.48328	-23.7617	0.0446609	11.3871	21.4288	102.841
50.31	Burgsvik Ss Mem.	4.19086	-8.34173
50.98	Burgsvik Ss Mem.	4.28314	-7.32178				23.2035	417.426
51.32	Burgsvik Ss Mem.	5.42118	-6.64421
51.92	Eke	6.70378	-7.27284	-23.8872	0.0269639	17.5416	16.4033	696.988
52.73	Eke	7.21008	-6.42554
53.57	Eke	6.55762	-7.03476	-24.7282	0.0527753	63.274	23.0627	493.79
54.73	Eke	5.61627	-5.63806
55.7	Eke	6.08834	-7.23195	-24.0048	0.0339317	42.586	27.3041	416.034
56.74	Eke	4.57492	-5.38404
57.81	Eke	6.89226	-6.60123	-24.3724	0.107062	77.4748	21.9702	378.593
58.74	Eke	7.5004	-7.46349
59.75	Eke	3.76026	-6.63177	-23.997	0.241227	46.9715	25.0464	430.351
60.66	Eke	2.76993	-4.25578
61.69	Eke	5.07191	-5.99938	-26.3368	0.0223052	53.9149	18.7296	516.424
62.74	Eke	4.1542	-5.97741
63.34	Eke	4.22568	-6.17456	-24.3299	0.415428	59.0469	18.935	428.059
63.91	Eke	3.73663	-5.24573
64.68	Eke	3.71314	-6.12334	-25.3919	0.130888	65.6102	24.5593	547.384
65.42	Eke	1.93578	-6.05236
65.89	Eke	1.13022	-5.85173	-26.5642	0.144136	51.5673	20.6208	730.806
66.19	Eke	1.43974	-4.69998
66.64	När	1.64847	-5.37876	-30.1213	0.163445	36.0544	13.146	665.61
67.71	När	1.17082	-5.31161
68.64	När	1.23311	-6.30883	-27.3577	0.469706	34.2608	16.2706	423.477
69.66	När	1.42846	-5.5091
70.62	När	1.57449	-6.48958	-30.9565	0.171333	35.1749	11.8932	517.725
72.66	När	1.5399	-6.24673	-28.286	0.228935	23.7646	12.3446	274.082
73.74	När	0.932088	-5.65037
74.74	När	0.847458	-6.48528	-30.2936	0.0798095	30.053	1.42234	345.309
75.71	När	0.82558	-6.49531
76.71	När	0.800341	-5.88482		0.44606	30.4552	8.8003	388.932
77.69	När	0.644915	-5.74304
78.74	När	0.645529	-6.24165	-28.249	0.657681	29.2968	3.20876	505.126
79.73	När	1.19454	-6.13491
80.66	När	0.659952	-9.09146	-29.4591	0.105112	27.7081	16.9967	338.488
81.74	När	0.131289	-5.62576
82.74	När	1.12445	-6.655	-27.393	0.325485	66.5346
83.72	När	0.774483	-5.287
84.77	När	0.360905		-31.1002	0.0629709	24.676	13.0578	497.786
85.72	När	0.33518	-4.90464
86.7	När			-27.5663	0.126376	28.236	14.5044	502.358
87.73	När	0.700491	-5.34572
88.62	När	0.405137	-5.4394	-30.6	0.116299	25.0651	10.6298	358.853
